# Supplementary material for: Serum N-glycans as independent predictors of the incidence of type 2 diabetes: a prospective investigation in the AEGIS cohort
Source: publisher site journal article supplement (doi:10.1515/cclm-2025-0045), 2025-06-24
Supplement: Supplementary file 1 [file j_cclm-2025-0045_suppl_002.pdf]

Supplementary Figure 2. Glycans that compound glycome peak 37 and glycome peak 24 [Saldova R et al, 2014]

|      |                                         |  |
|------|-----------------------------------------|--|
| GP37 | A3F1G3S[3,3,3]3<br>(47.2%) <sup>†</sup> |  |
|      | A3F1G3S[3,3,6]3<br>(33.1%) <sup>†</sup> |  |
|      | FA3BG3S[3,3,3]3<br>(9.2%) <sup>†</sup>  |  |
|      | *A3G3S[3,3,6]3<br>(4.3%) <sup>†</sup>   |  |
|      | FA3BG3S[6,6,6]3<br>(4.3%) <sup>†</sup>  |  |
|      | *A3G3S[3,6,6]3<br>(1.2%) <sup>†</sup>   |  |
|      | *A3G3S[3,3,3]3<br>(0.6%) <sup>†</sup>   |  |
| GP24 | *A2G2S[3,6]2<br>(55.7%) <sup>†</sup>    |  |
|      | *A2G2S[3,3]2<br>(31.8%) <sup>†</sup>    |  |
|      | *FA2G2S[3,3]2<br>(9.3%) <sup>†</sup>    |  |
|      | A2F1G2S[3]1<br>(2.7%) <sup>†</sup>      |  |
|      | A2F1G2S[6]1<br>(0.5%) <sup>†</sup>      |  |

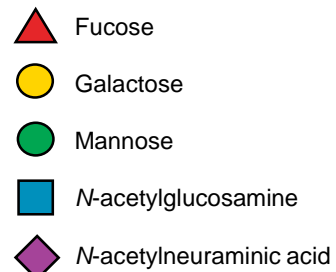

Abbreviations: GP, glycome peak.

\*Glycan structures that are part of other GPs with a different spatial conformation (isomers), <sup>†</sup>Percentage of glycan structure in the GP.
